# Supplementary figures and images for: Carvacrol: An In Silico Approach of a Candidate Drug on HER2, PI3Kα, mTOR, hER‐α, PR, and EGFR Receptors in the Breast Cancer
Source: Hindawi journal article supplement (doi:10.1155/2020/8830665), 2020-01-01

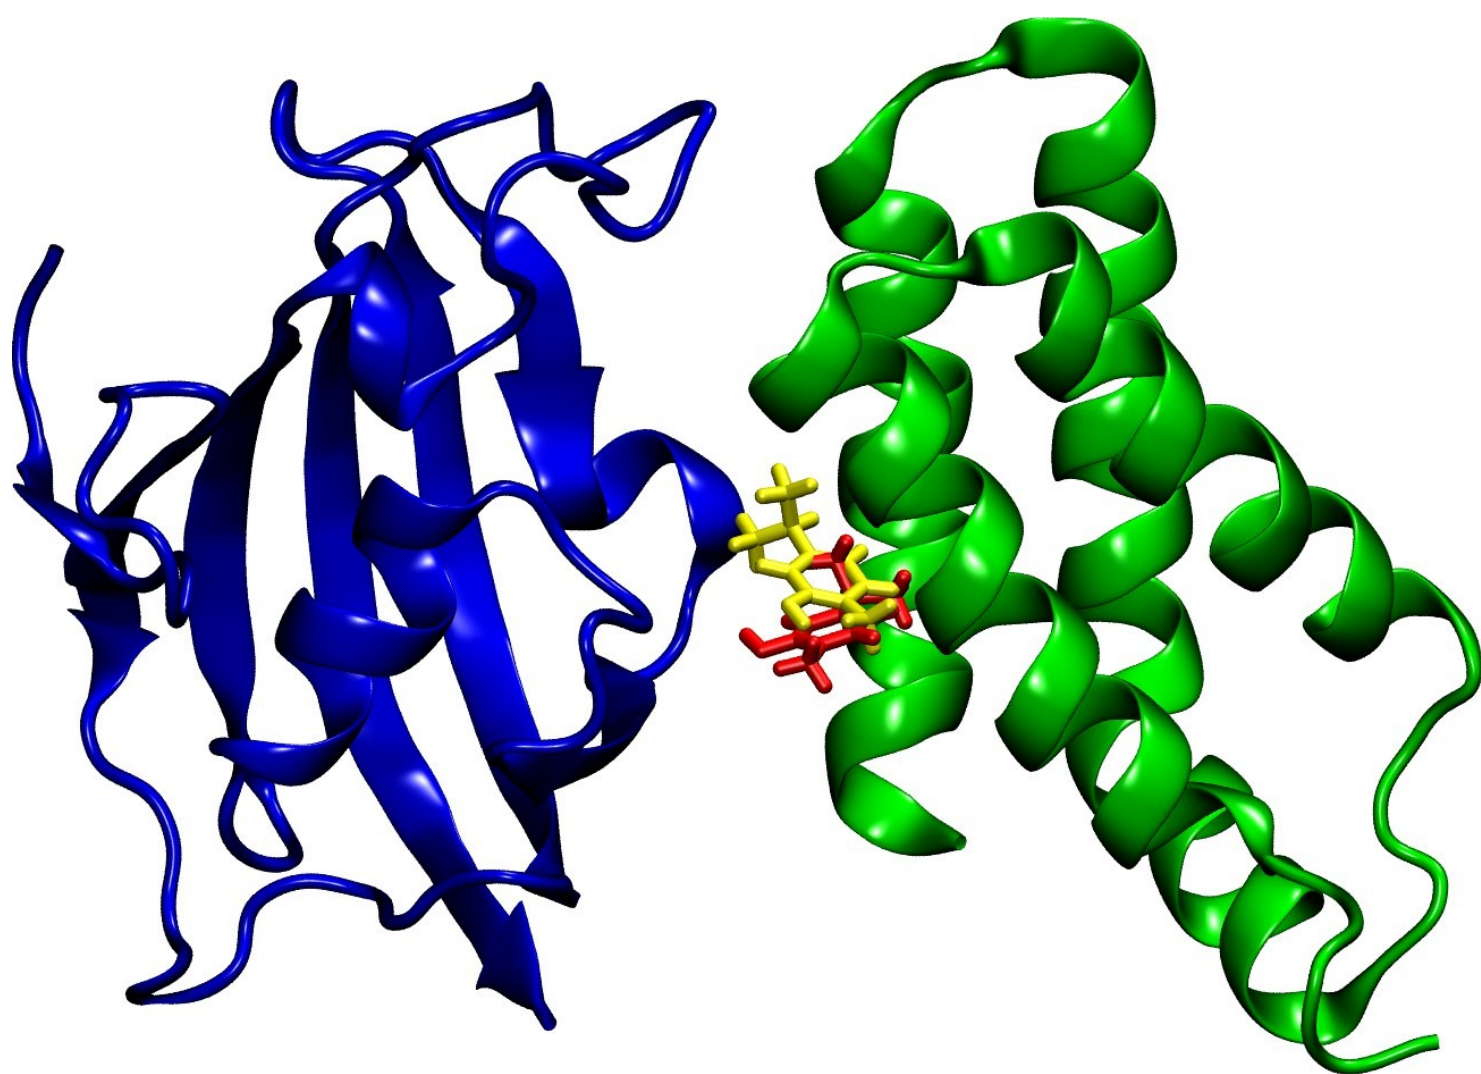

Supplement: f1 [file 8830665.f1.zip]

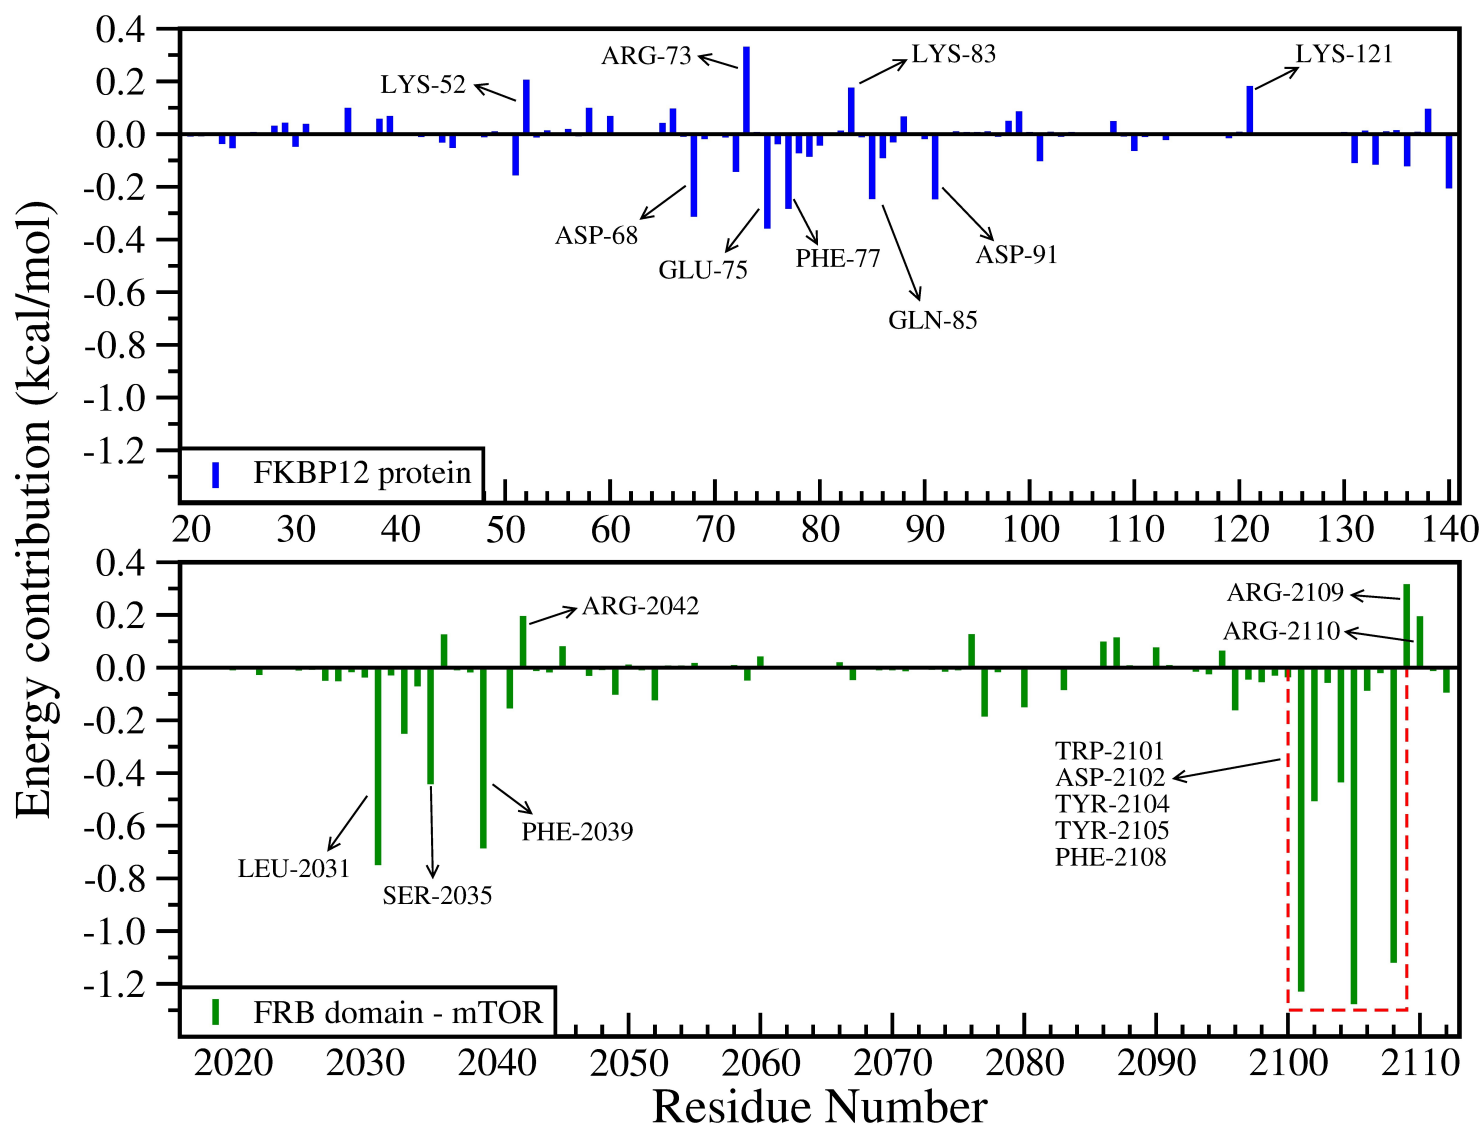

Supplement: f1 [file 8830665.f1.zip]

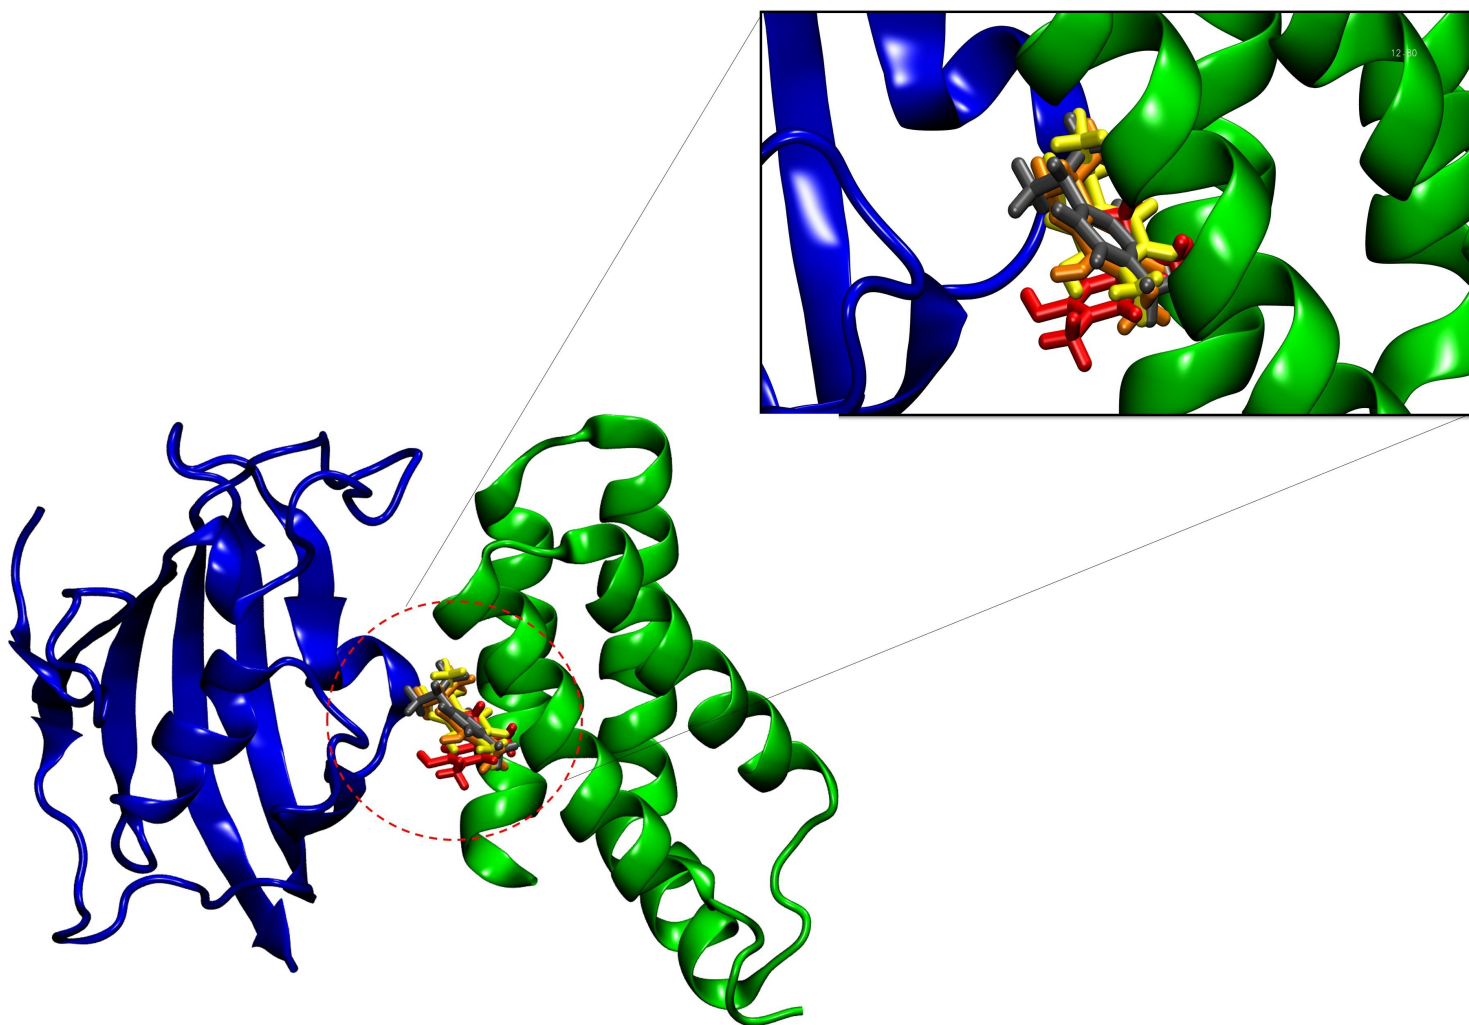

Supplement: f1 [file 8830665.f1.zip]

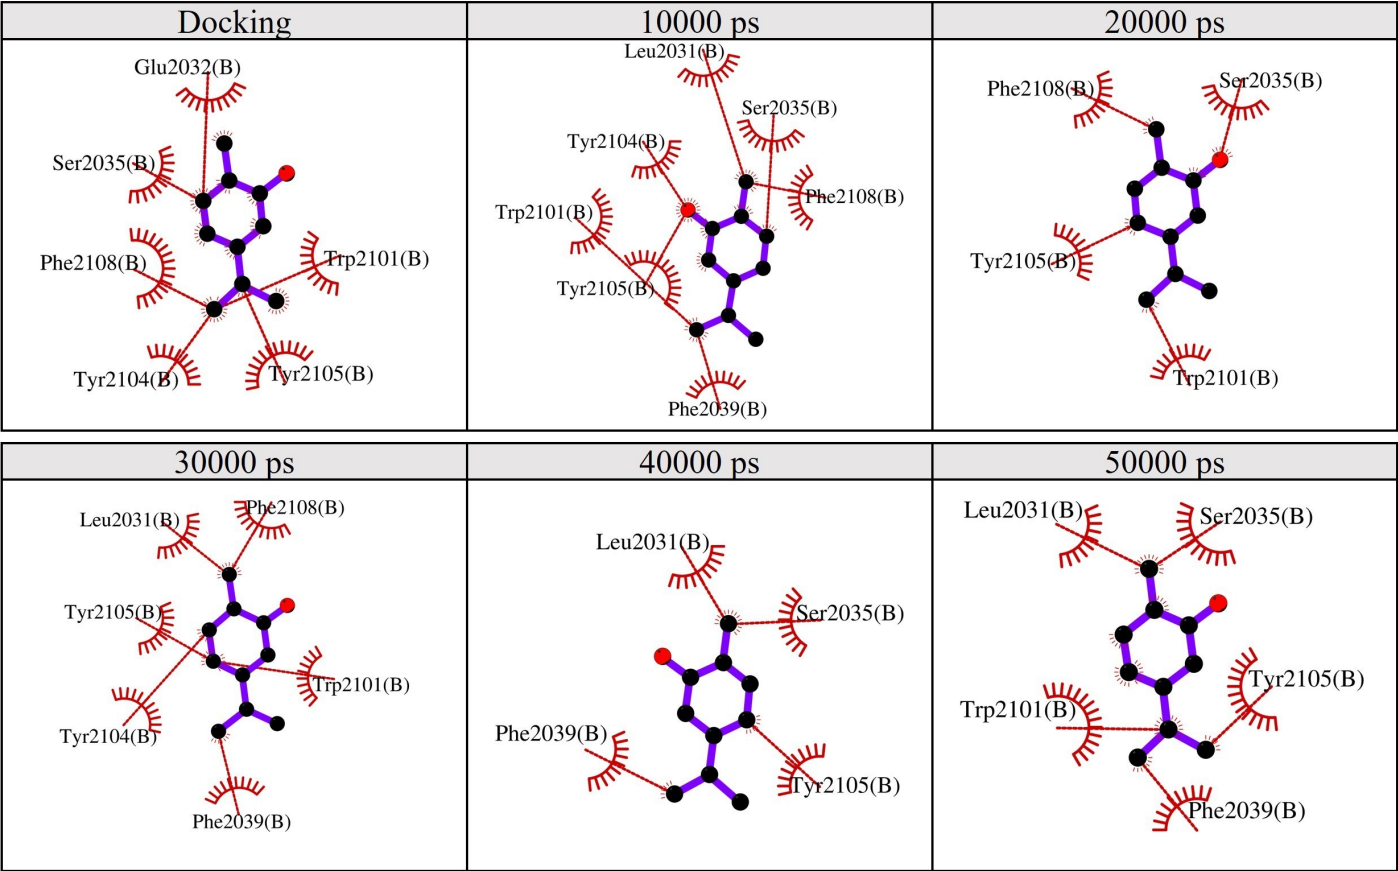

Supplement: f1 [file 8830665.f1.zip]
